# Supplementary material
Source: PubMed Central journal article supplement (PMC6373472)
Supplement: NIHMS989816-supplement-Document_S1.pdf [file NIHMS989816-supplement-Document_S1.pdf]

**Supplemental Information**

**Synthetic Lethal and Convergent Biological Effects  
of Cancer-Associated Spliceosomal Gene Mutations**

**Stanley Chun-Wei Lee, Khrystyna North, Eunhee Kim, Eunjung Jang, Esther Obeng, Sydney X. Lu, Bo Liu, Daichi Inoue, Akihide Yoshimi, Michelle Ki, Mirae Yeo, Xiao Jing Zhang, Min Kyung Kim, Hana Cho, Young Rock Chung, Justin Taylor, Benjamin H. Durham, Young Joon Kim, Alessandro Pastore, Sebastien Monette, James Palacino, Michael Seiler, Silvia Buonamici, Peter G. Smith, Benjamin L. Ebert, Robert K. Bradley, and Omar Abdel-Wahab**

**Figure S1**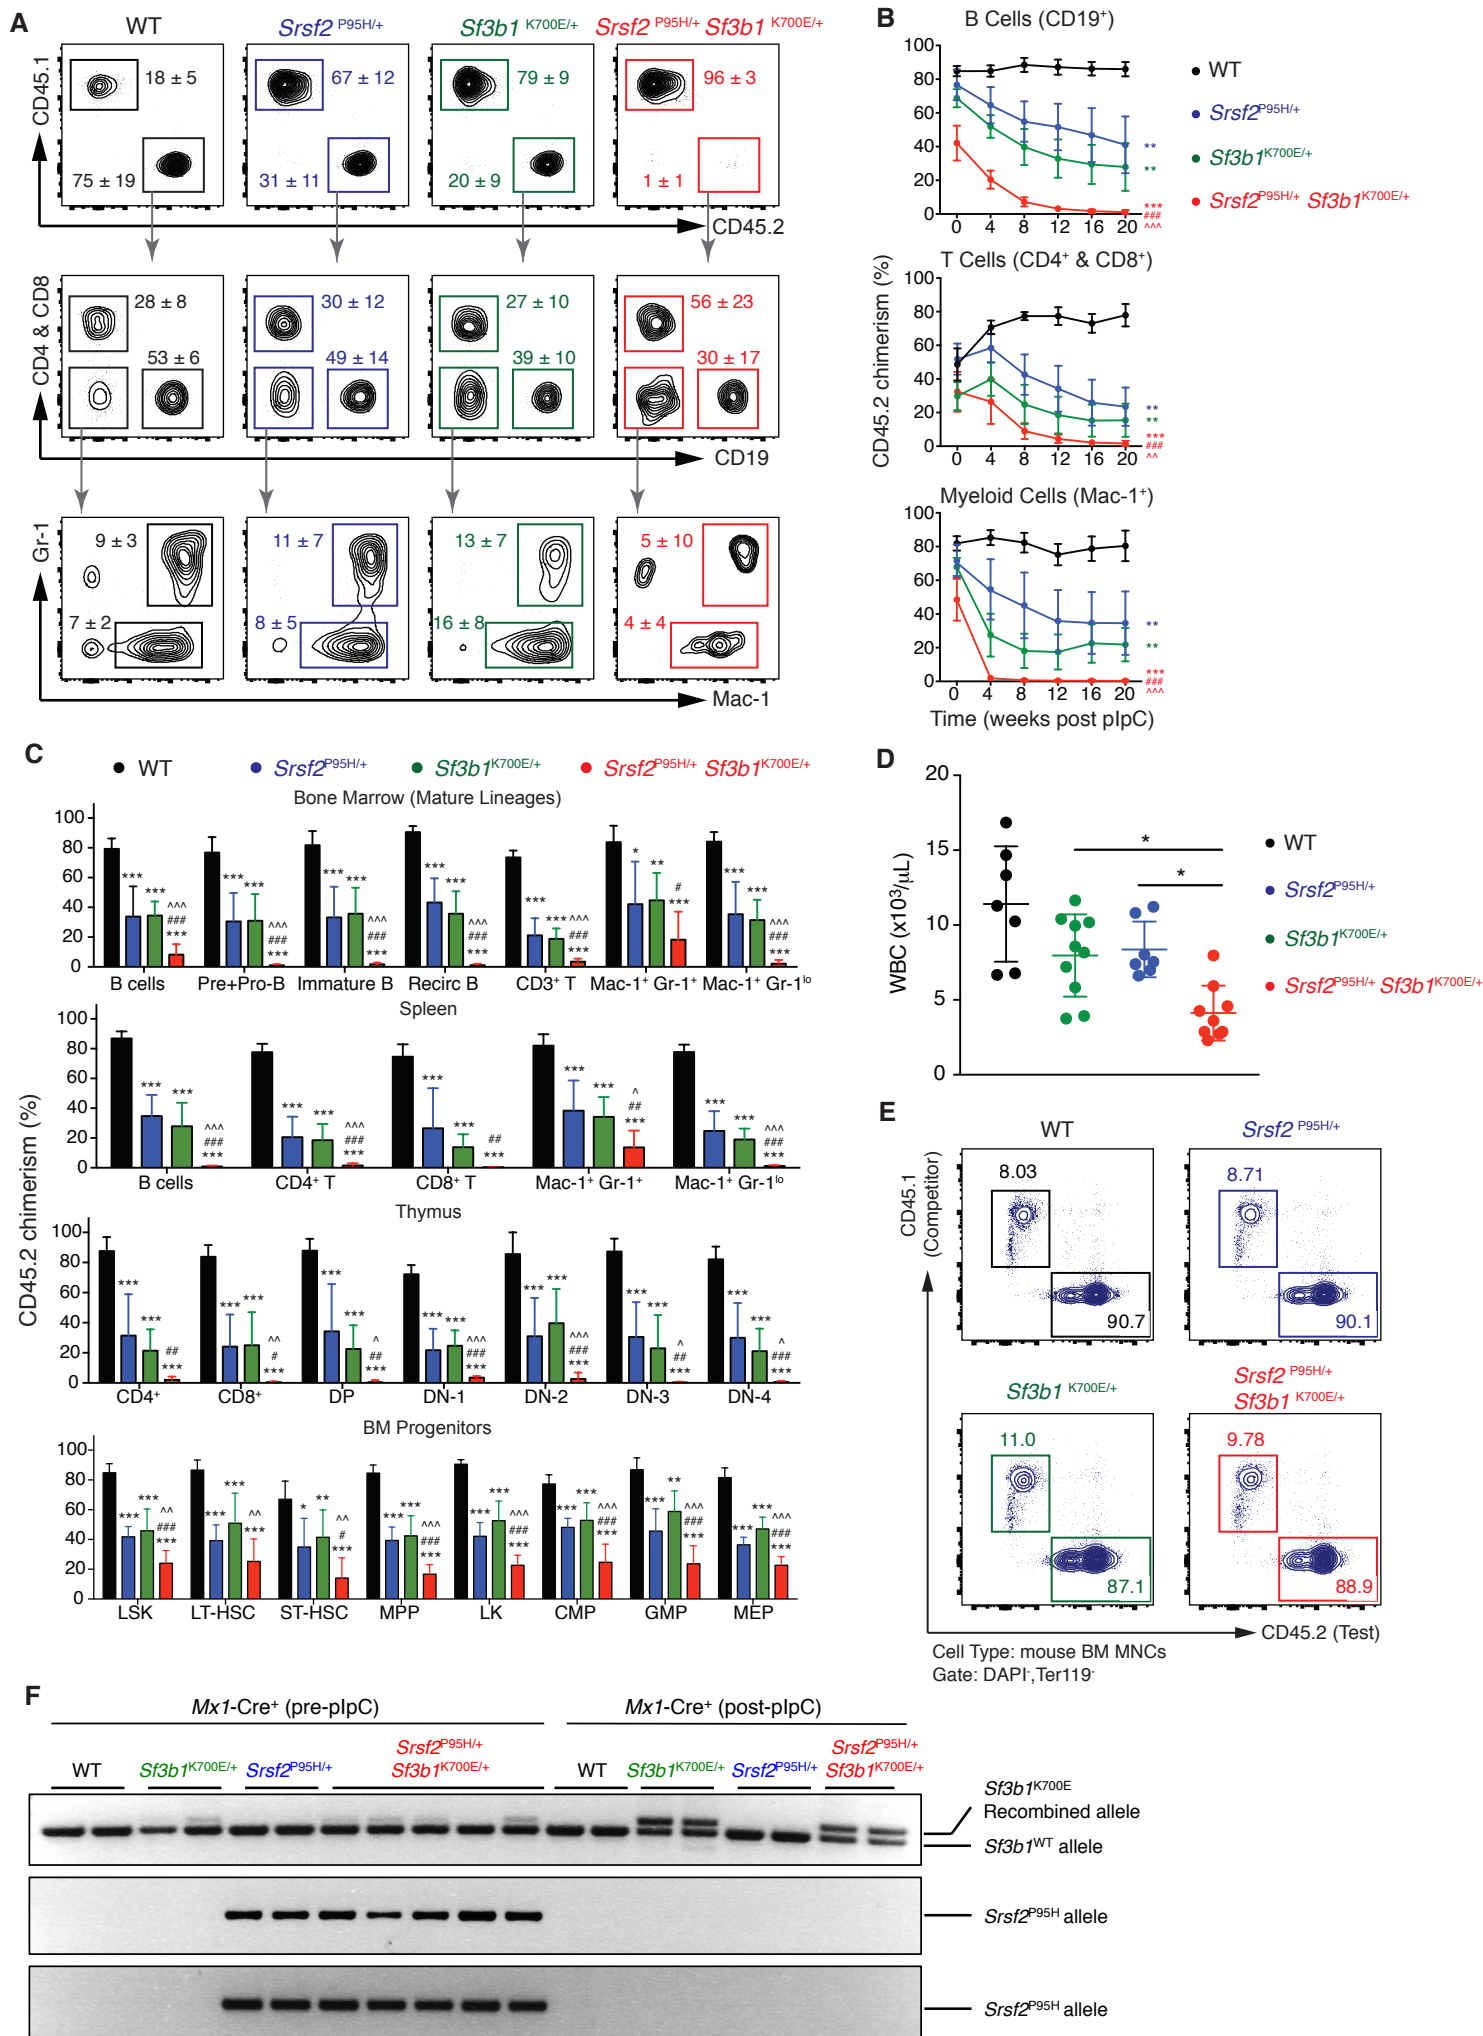

Figure S1

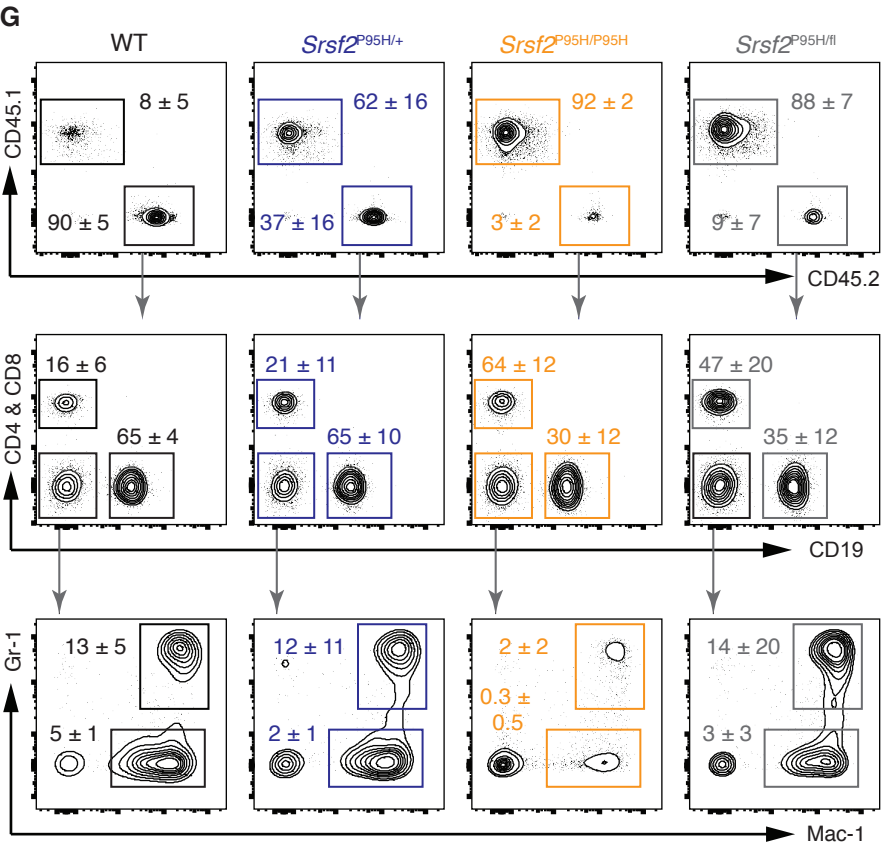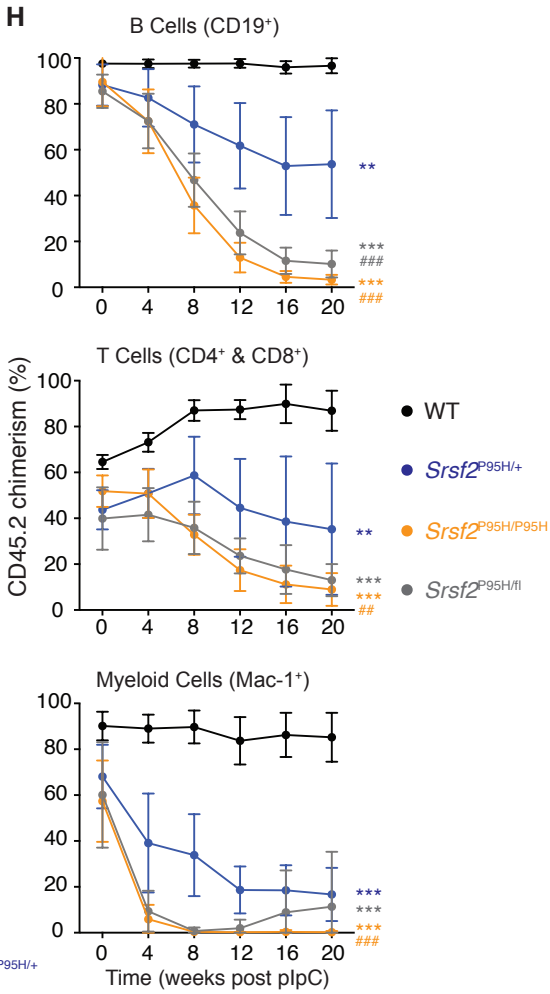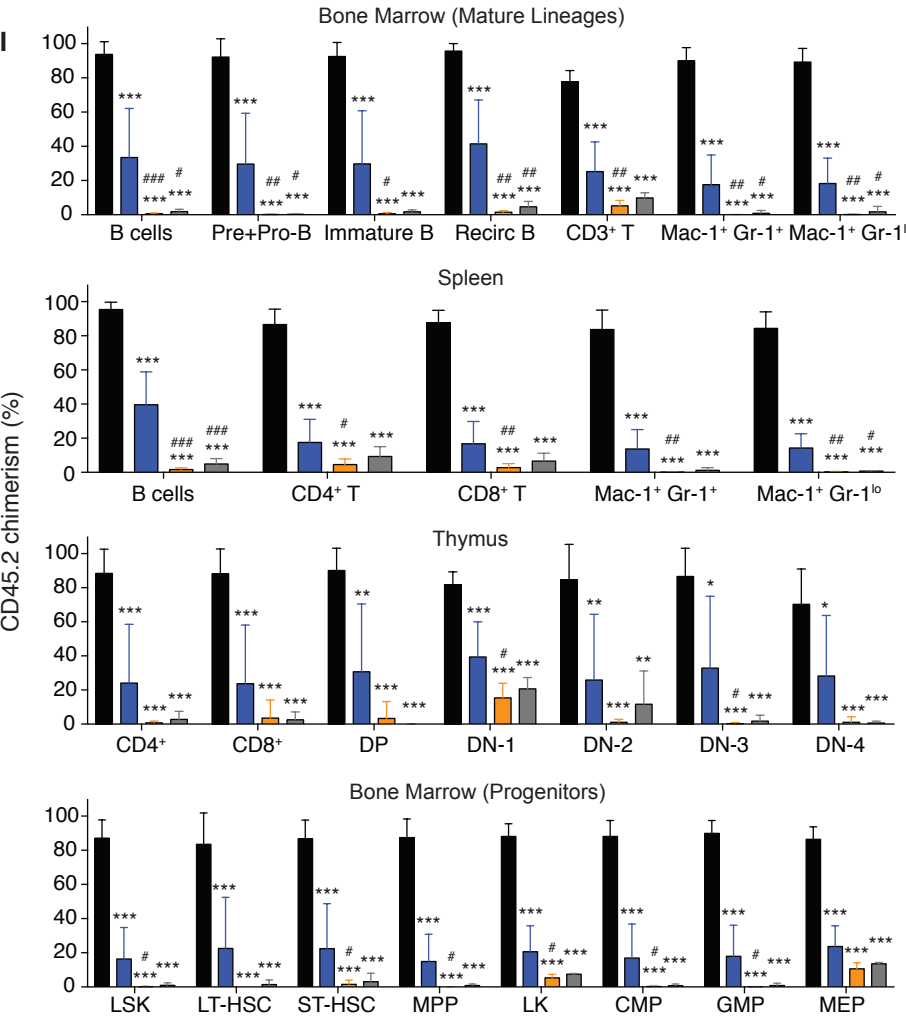

**Figure S1 (Related to Figure 1). Severe self-renewal disadvantage of hematopoietic stem cells from *Srsf2*<sup>P95H/+</sup> *Sf3b1*<sup>K700E/+</sup> double-mutant and *Srsf2*<sup>P95H/P95H</sup> homozygous mutant mice.** (A) Representative FACS plots of CD45.2 (donor-derived) cells of both lymphoid and myeloid lineages in the peripheral blood of CD45.1 recipient mice reconstituted with bone marrow (BM) mononuclear cells (MNCs) from *Mx1-Cre*<sup>+</sup> WT, *Mx1-Cre*<sup>+</sup> *Srsf2*<sup>P95H/+</sup>, *Mx1-Cre*<sup>+</sup> *Sf3b1*<sup>K700E/+</sup> and *Mx1-Cre*<sup>+</sup> *Srsf2*<sup>P95H/+</sup> *Sf3b1*<sup>K700E/+</sup> mice 20 weeks post plpC administration. (B) CD45.2 (donor-derived) chimerism in the B, T or myeloid lineages in peripheral blood (PB) of CD45.1 recipient mice (n=10 mice per genotype) in competitive BM transplantation (BMT). (C) Analysis of CD45.2 chimerism in the various cellular lineages in the bone marrow, spleen and thymus 20 weeks post plpC administration in CD45.1 recipient mice. (D) White blood cell (WBC) count of *Mx1-Cre*<sup>+</sup> WT, *Mx1-Cre*<sup>+</sup> *Srsf2*<sup>P95H/+</sup>, *Mx1-Cre*<sup>+</sup> *Sf3b1*<sup>K700E/+</sup> and *Mx1-Cre*<sup>+</sup> *Srsf2*<sup>P95H/+</sup> *Sf3b1*<sup>K700E/+</sup> mice 52 weeks post plpC administration. (E) Representative FACS plots of BM MNC samples prior to noncompetitive BMT. (F) Representative genotyping PCR gel of PB MNCs of *Mx1-Cre*<sup>+</sup> WT, *Mx1-Cre*<sup>+</sup> *Srsf2*<sup>P95H/+</sup>, *Mx1-Cre*<sup>+</sup> *Sf3b1*<sup>K700E/+</sup> and *Mx1-Cre*<sup>+</sup> *Srsf2*<sup>P95H/+</sup> *Sf3b1*<sup>K700E/+</sup> mice pre- and post-plpC administration. Two separate PCR strategies were used for to detect *Srsf2*<sup>P95H</sup> recombination. Successful allele recombination is shown by the absence of a PCR product. (G) Representative FACS plots of CD45.2 (donor-derived) cells of both lymphoid and myeloid lineages in the peripheral blood of CD45.1 recipient mice reconstituted with bone marrow (BM) mononuclear cells (MNCs) from *Mx1-Cre*<sup>+</sup> WT, *Mx1-Cre*<sup>+</sup> *Srsf2*<sup>P95H/+</sup>, *Mx1-Cre*<sup>+</sup> *Srsf2*<sup>P95H/P95H</sup> and *Mx1-Cre*<sup>+</sup> *Srsf2*<sup>P95H/fl</sup> mice 20 weeks post plpC administration. (H) Percentage of CD45.2 (donor-derived) chimerism in the B, T or myeloid lineages in peripheral blood of CD45.1 recipient mice (n=5-10 mice per genotype) in competitive BMT. (I) Analysis of CD45.2 chimerism in the various cellular lineages in the bone marrow, spleen and thymus 20 weeks post plpC administration in CD45.1 recipient mice. Error bars represent mean±standard deviation. Analysis of variance followed by Tukey's post-hoc test was used to compare differences between groups. \*p<0.05, \*\*p<0.01 and \*\*\*p<0.001 versus *Mx1-Cre*<sup>+</sup> WT mice; ^p<0.05, ^^p<0.01 and ^^^p<0.001 versus *Mx1-Cre*<sup>+</sup> *Sf3b1*<sup>K700E/+</sup> mice; #p<0.05, ##p<0.01 and ###p<0.001 versus *Mx1-Cre*<sup>+</sup> *Srsf2*<sup>P95H/+</sup> mice.

**Figure S2**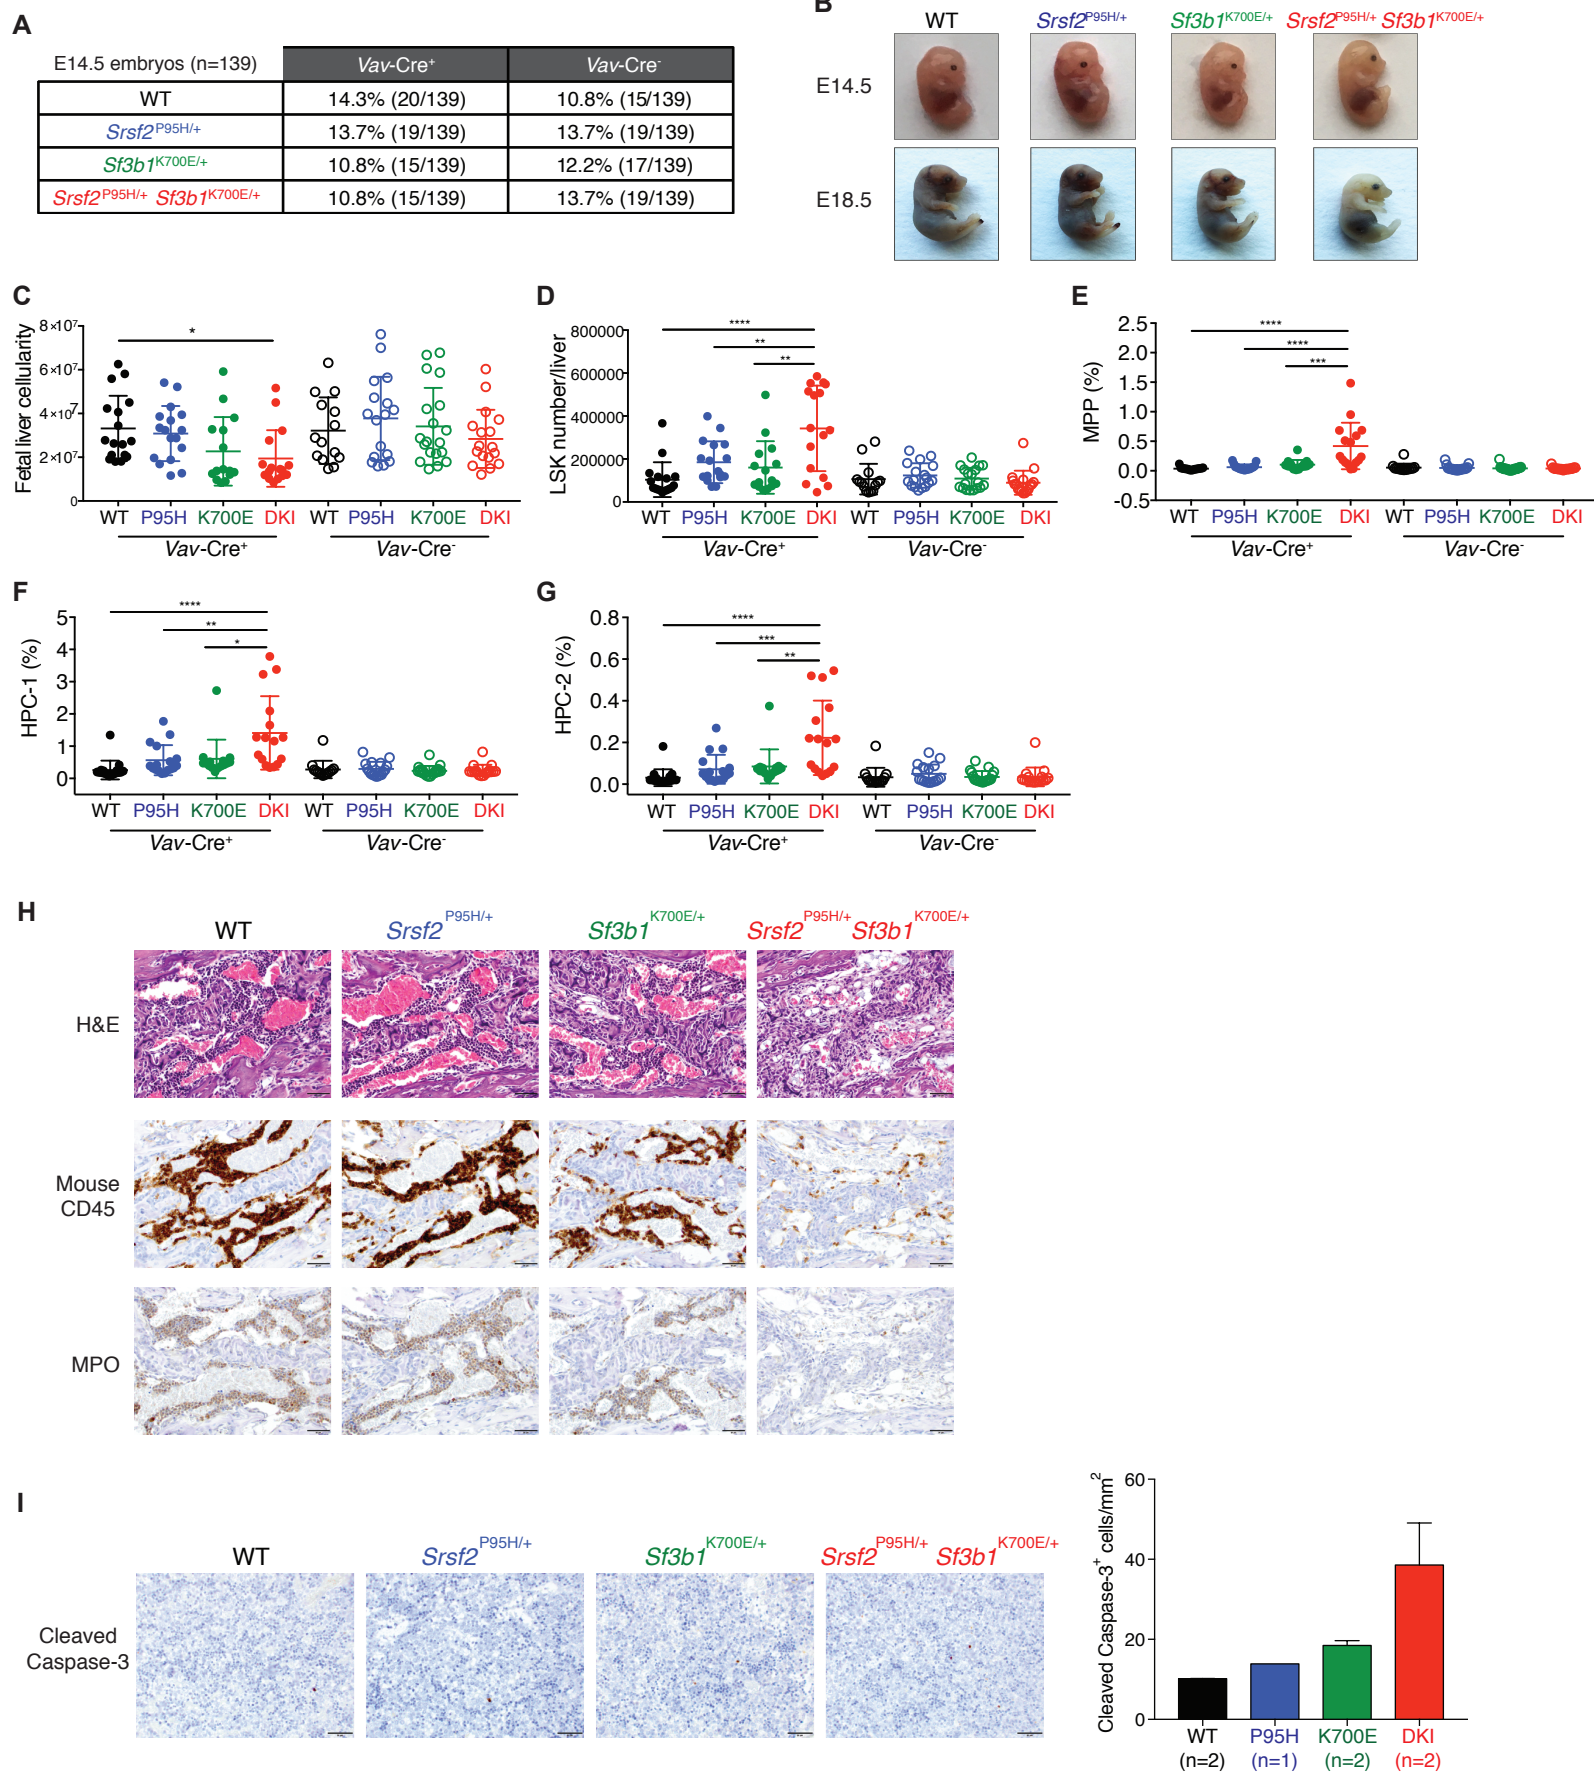

**Figure S2 (Related to Figure 2). Co-expression of *Srsf2* and *Sf3b1* mutations results in death before birth in *Vav-Cre*<sup>+</sup> *Srsf2*<sup>P95H/+</sup> *Sf3b1*<sup>K700E/+</sup> mice. (A)** Number of embryos detected at embryonic day 14.5 (E14.5) per genotype from crossing *Sf3b1*<sup>K700E/+</sup> x *Vav-Cre*<sup>+</sup> *Srsf2*<sup>P95H/+</sup> or *Srsf2*<sup>P95H/+</sup> x *Vav-Cre*<sup>+</sup> *Sf3b1*<sup>K700E/+</sup> mice. **(B)** Photographs of representative fetuses with each genotype at E14.5 and E18.5. **(C)** Number of viable fetal liver mononuclear cells (MNCs) and **(D)** LSK (Lin<sup>-</sup> Sca-1<sup>+</sup> c-Kit<sup>+</sup>) cells from E14.5 embryos from (A). Frequency of **(E)** MPP (LSK CD48<sup>-</sup> CD150<sup>-</sup>), **(F)** HPC-1 (LSK CD48<sup>+</sup> CD150<sup>-</sup>), and **(G)** HPC-2 (LSK CD48<sup>+</sup> CD150<sup>+</sup>) cells amongst fetal liver MNCs at E14.5. **(H)** Photomicrographs of hematoxylin and eosin (H&E), anti-CD45, and anti-myeloperoxidase (MPO) immunohistochemical stains of E18.5 marrow cavity cells of the mice in (B). **(I)** Photomicrographs of cleaved caspase-3 immunohistochemical stains of E18.5 fetal liver cells of the mice in (B) with quantitation on right. Error bars represent mean±standard deviation. Analysis of variance followed by Tukey's post-hoc test was used to compare differences between groups. \*p<0.05, \*\*p<0.01, \*\*\*p<0.001, and \*\*\*\*p<0.0001.

Figure S3

**A**

|   | Genotypes Compared                                                                                | Expected   |       | Observed   |       | p value |
|---|---------------------------------------------------------------------------------------------------|------------|-------|------------|-------|---------|
|   |                                                                                                   | Convergent | Total | Convergent | Total |         |
| A | <i>Sf3b1</i> <sup>K700E/+</sup><br><i>Srsf2</i> <sup>P95H/+</sup> <i>Sf3b1</i> <sup>K700E/+</sup> | 186        | 431   | 197        | 429   | 0.23    |
|   | <i>Srsf2</i> <sup>P95H/+</sup><br><i>Srsf2</i> <sup>P95H/+</sup> <i>Sf3b1</i> <sup>K700E/+</sup>  | 143        | 232   | 135        | 236   | 0.81    |
| B | <i>Sf3b1</i> <sup>K700E/+</sup><br><i>Srsf2</i> <sup>P95H/+</sup> <i>Sf3b1</i> <sup>K700E/+</sup> | 108        | 248   | 90         | 241   | 0.90    |
|   | <i>Srsf2</i> <sup>P95H/+</sup><br><i>Srsf2</i> <sup>P95H/+</sup> <i>Sf3b1</i> <sup>K700E/+</sup>  | 161        | 385   | 161        | 378   | 0.44    |
| C | <i>Sf3b1</i> <sup>K700E/+</sup><br><i>Srsf2</i> <sup>P95H/+</sup> <i>Sf3b1</i> <sup>K700E/+</sup> | 121        | 239   | 87         | 233   | 0.99    |
|   | <i>Srsf2</i> <sup>P95H/+</sup><br><i>Srsf2</i> <sup>P95H/+</sup> <i>Sf3b1</i> <sup>K700E/+</sup>  | 108        | 198   | 99         | 198   | 0.79    |

**B**

|   | Expected     |                  | Observed     |                  | p value               |
|---|--------------|------------------|--------------|------------------|-----------------------|
|   | Dysregulated | Expressed Coding | Dysregulated | Expressed Coding |                       |
| A | 217          | 11031            | 275          | 10943            | 3.6x10 <sup>-3</sup>  |
| B | 187          | 11007            | 563          | 10759            | 2.2x10 <sup>-16</sup> |
| C | 143          | 11026            | 261          | 10793            | 5.5x10 <sup>-10</sup> |

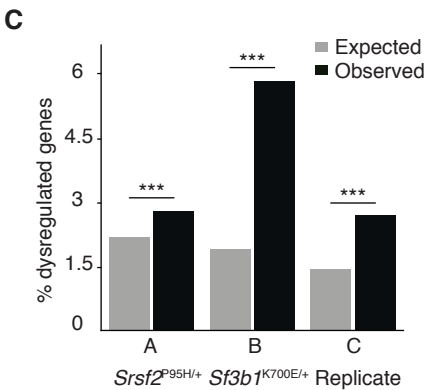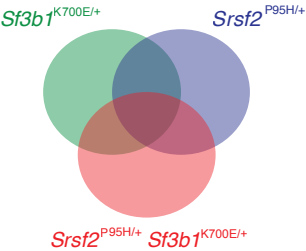

**Figure S3 (Related to Figure 3). *Srsf2* and *Sf3b1* mutations have distinct and independent effects on gene dysregulation.** **(A)** Table illustrating the numbers of expected versus observed coding genes exhibiting dysregulated expression that were shared between the illustrated comparisons between genotypes ("A", "B", and "C" refer to replicates of RNA-seq). The set of expected coding genes exhibiting dysregulation was defined assuming that the *Sf3b1* and *Srsf2* mutations were independent, such that the double-mutant gene expression program was simply the mean of the two single-mutant gene expression programs. "Convergent" is defined as the number of differentially expressed genes shared by the genotypes compared. "Total" is defined as the number of differentially expressed genes in the first genotype listed per category. p values were computed using the one-sided binomial proportion test. **(B)** Table illustrating the numbers of expected versus observed coding genes that were dysregulated in double-mutant cells relative to wild-type cells. The set of expected coding genes exhibiting dysregulation was defined as in (A). **(C)** Bar plots showing percentage (%) of expected versus observed coding genes exhibiting dysregulated expression in each replicate of *Mx1-Cre*<sup>+</sup> *Srsf2*<sup>P95H/+</sup> *Sf3b1*<sup>K700E/+</sup> cells relative to *Mx1-Cre*<sup>+</sup> WT cells. \*\*\*p<0.0001.

**Figure S4**

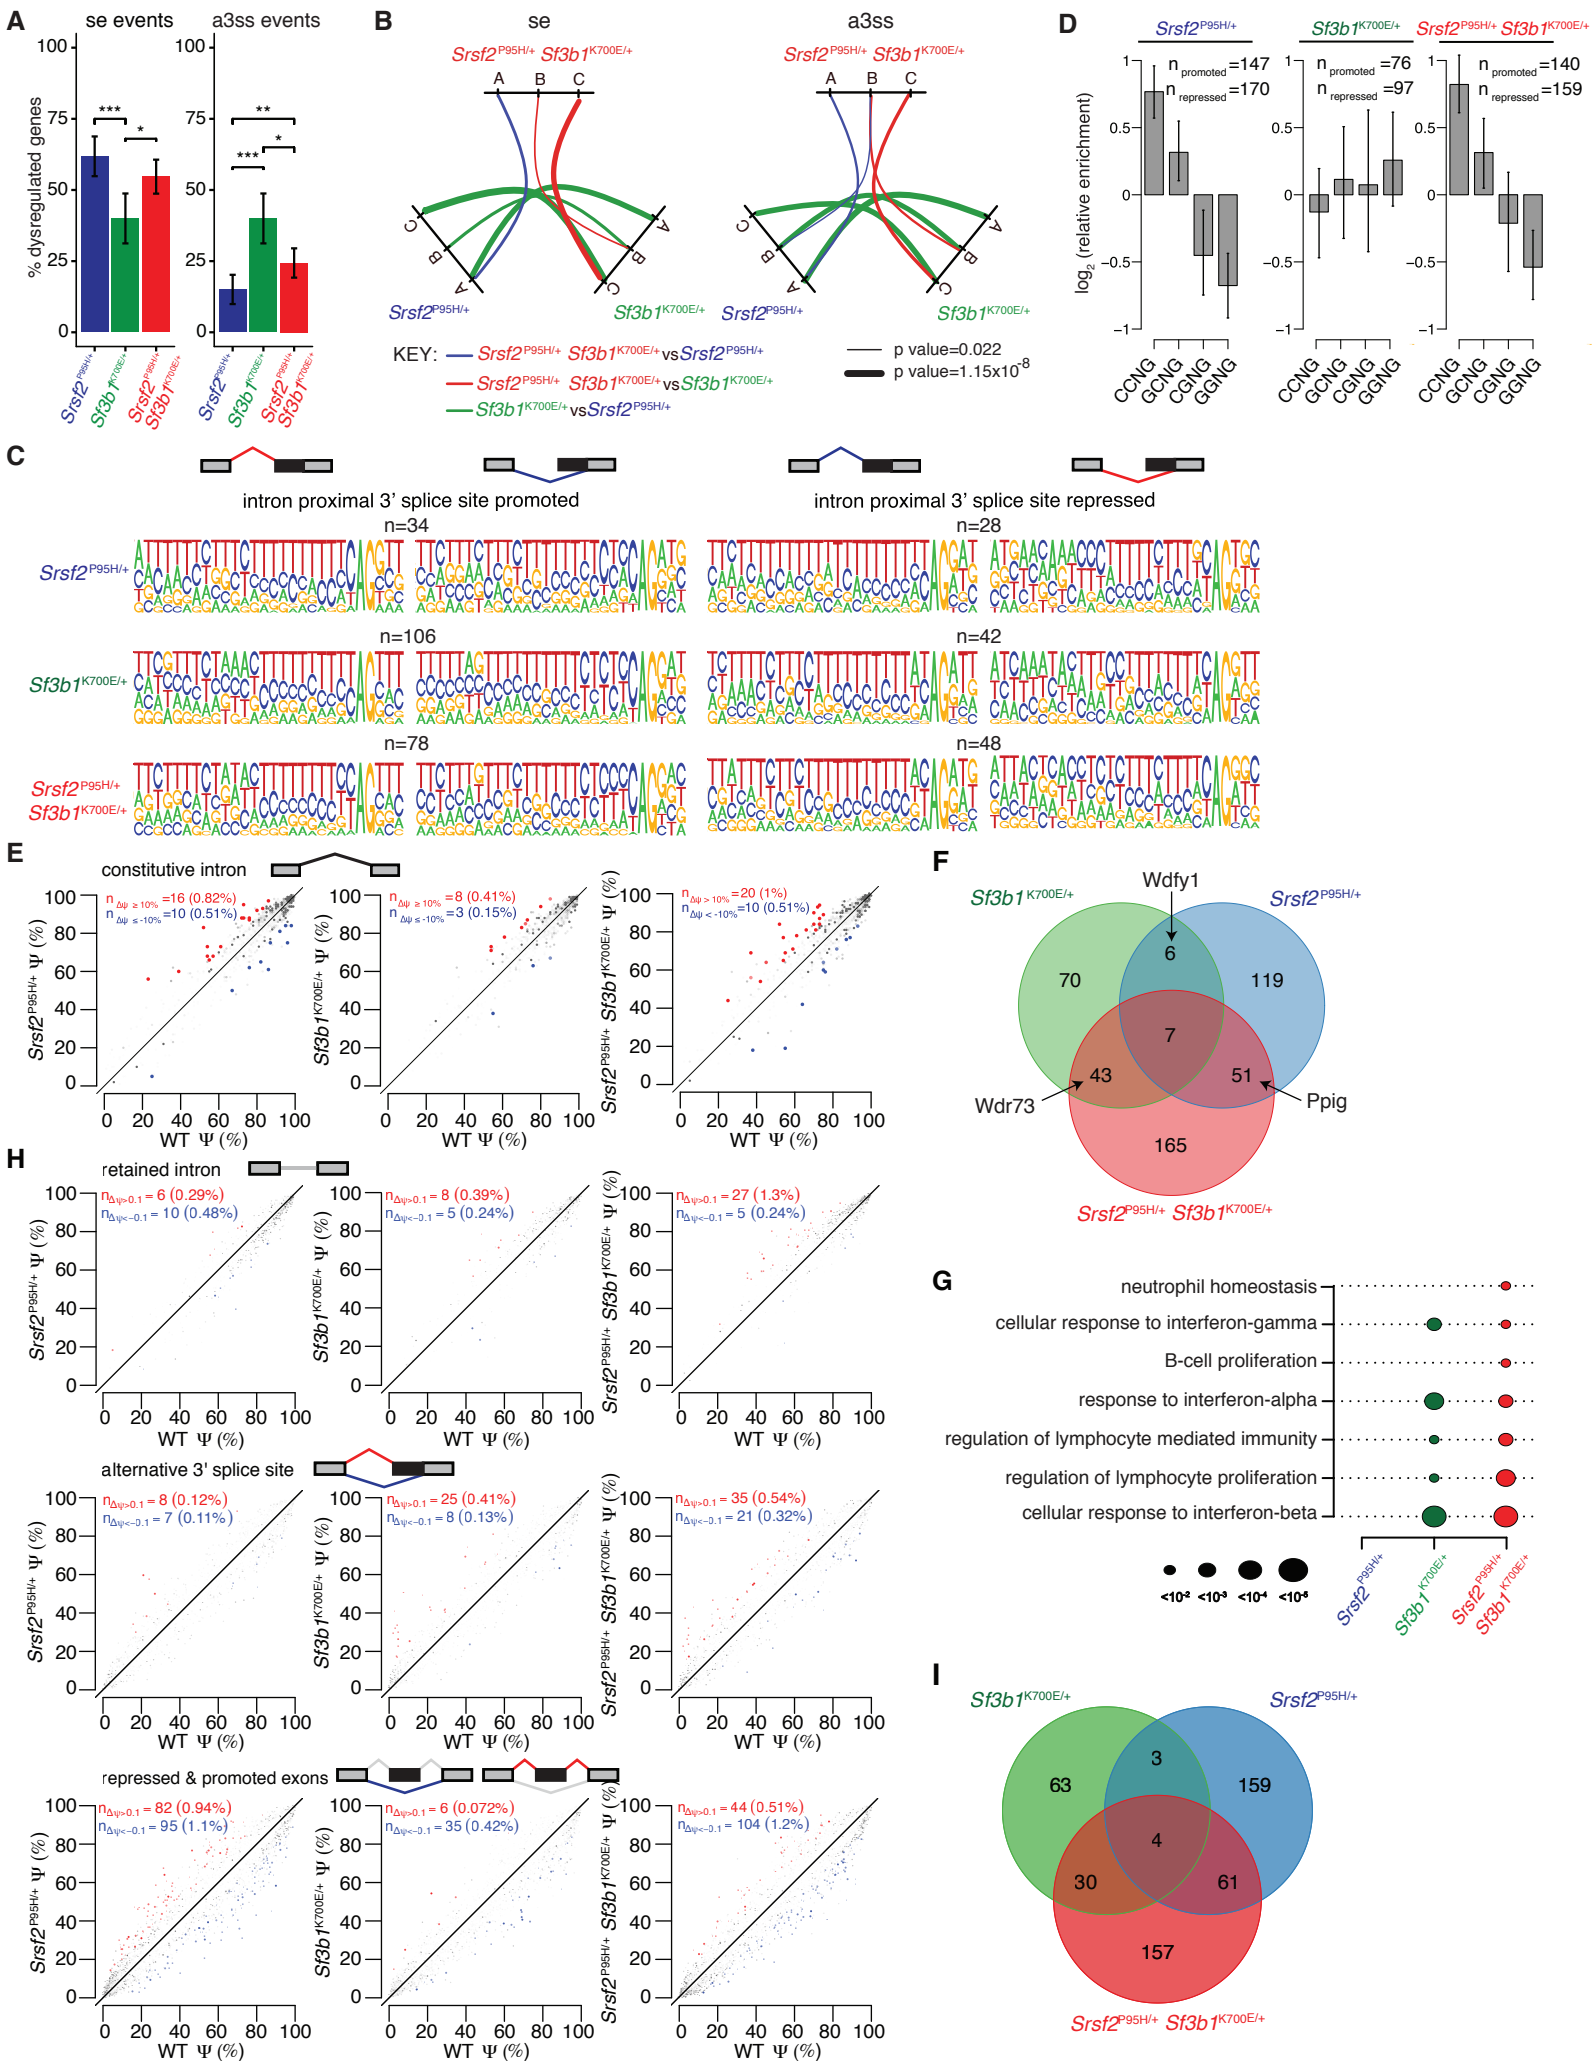

**Figure S4 (Related to Figure 4). *Srsf2* and *Sf3b1* mutations have distinct and independent effects on RNA splicing.** (A) Bar plot illustrating the percentage of dysregulated splicing events that corresponded to cassette exon events (se; left) or competing 3' splice site events (a3ss; right) for each illustrated genotype relative to wild-type cells. P values were computed using a two sided binomial proportion test where \*\*p<0.01 and \*\*\*p<0.001. (B) Diagram illustrating whether there was a statistically significant difference in the fraction of dysregulated splicing events corresponding to cassette exon events (se; left) or competing 3' splice site events (a3ss; right). P values were computed using the binomial proportion test and are represented by the thickness of the lines. (C) Sequence logos associated with competing 3' splice sites that are differentially spliced in *Mx1-Cre<sup>+</sup> Srsf2<sup>P95H/+</sup>*, *Mx1-Cre<sup>+</sup> Sf3b1<sup>K700E/+</sup>*, and *Mx1-Cre<sup>+</sup> Srsf2<sup>P95H/+</sup> Sf3b1<sup>K700E/+</sup>* cells relative to *Mx1-Cre<sup>+</sup> WT* cells in any replicate. The left- and right-hand columns contain sequence logos created for the intron-proximal and intron-distal 3' splice sites. (D) Bar plots illustrating enrichment of different variants of the SSNG (S = C or G; N = any nucleotide) exonic splicing enhancer in *Mx1-Cre<sup>+</sup> Srsf2<sup>P95H/+</sup>*, *Mx1-Cre<sup>+</sup> Sf3b1<sup>K700E/+</sup>*, and *Mx1-Cre<sup>+</sup> Srsf2<sup>P95H/+</sup> Sf3b1<sup>K700E/+</sup>* cells relative to *Mx1-Cre<sup>+</sup> WT* cells. Enrichment computed using the alternatively spliced sequence for cassette exons that are differentially spliced in the indicated genotype comparisons. (E) Scatter plots of constitutive intron splicing in *Mx1-Cre<sup>+</sup> Srsf2<sup>P95H/+</sup>*, *Mx1-Cre<sup>+</sup> Sf3b1<sup>K700E/+</sup>*, and *Mx1-Cre<sup>+</sup> Srsf2<sup>P95H/+</sup> Sf3b1<sup>K700E/+</sup>* cells relative to *Mx1-Cre<sup>+</sup> WT* cells for replicate B. Axes indicate the fraction of mRNAs for which each constitutive intron is removed. Red and blue indicate constitutive introns that are preferentially spliced or retained, respectively, in mutant relative to wild-type cells. (F) Venn diagram showing the overlap between splicing events that were significantly dysregulated in *Mx1-Cre<sup>+</sup> Srsf2<sup>P95H/+</sup>*, *Mx1-Cre<sup>+</sup> Sf3b1<sup>K700E/+</sup>*, and *Mx1-Cre<sup>+</sup> Srsf2<sup>P95H/+</sup> Sf3b1<sup>K700E/+</sup>* cells relative to *Mx1-Cre<sup>+</sup> WT* cells for replicate B. Example genes illustrated below are indicated with arrows. (G) Gene Ontology (GO) enrichment analysis of *Vav-Cre<sup>+</sup> Srsf2<sup>P95H/+</sup>*, *Vav-Cre<sup>+</sup> Sf3b1<sup>K700E/+</sup>*, and *Vav-Cre<sup>+</sup> Srsf2<sup>P95H/+</sup> Sf3b1<sup>K700E/+</sup>* cells relative to *Vav-Cre<sup>+</sup> WT* cells. Circle size indicates the magnitude of the p value for each term and genotype comparison. (H) Scatter plots of retained introns (top), competing 3' splice sites (middle), and cassette exon inclusion (bottom) in *Vav-Cre<sup>+</sup> Srsf2<sup>P95H/+</sup>*, *Vav-Cre<sup>+</sup> Sf3b1<sup>K700E/+</sup>*, and *Vav-Cre<sup>+</sup> Srsf2<sup>P95H/+</sup> Sf3b1<sup>K700E/+</sup>* cells relative to *Vav-Cre<sup>+</sup> WT* cells. Axes indicate the fraction of mRNAs containing each cassette exon in the indicated sample. Red and blue indicate cassette exons whose inclusion is promoted or repressed, respectively, in mutant relative to wild-type cells. (I) Venn diagram

showing the overlap between splicing events that were significantly dysregulated in *Vav-Cre*<sup>+</sup> *Srsf2*<sup>P95H/+</sup>, *Vav-Cre*<sup>+</sup> *Sf3b1*<sup>K700E/+</sup>, and *Vav-Cre*<sup>+</sup> *Srsf2*<sup>P95H/+</sup> *Sf3b1*<sup>K700E/+</sup> cells relative to *Vav-Cre*<sup>+</sup> WT cells.

Figure S5

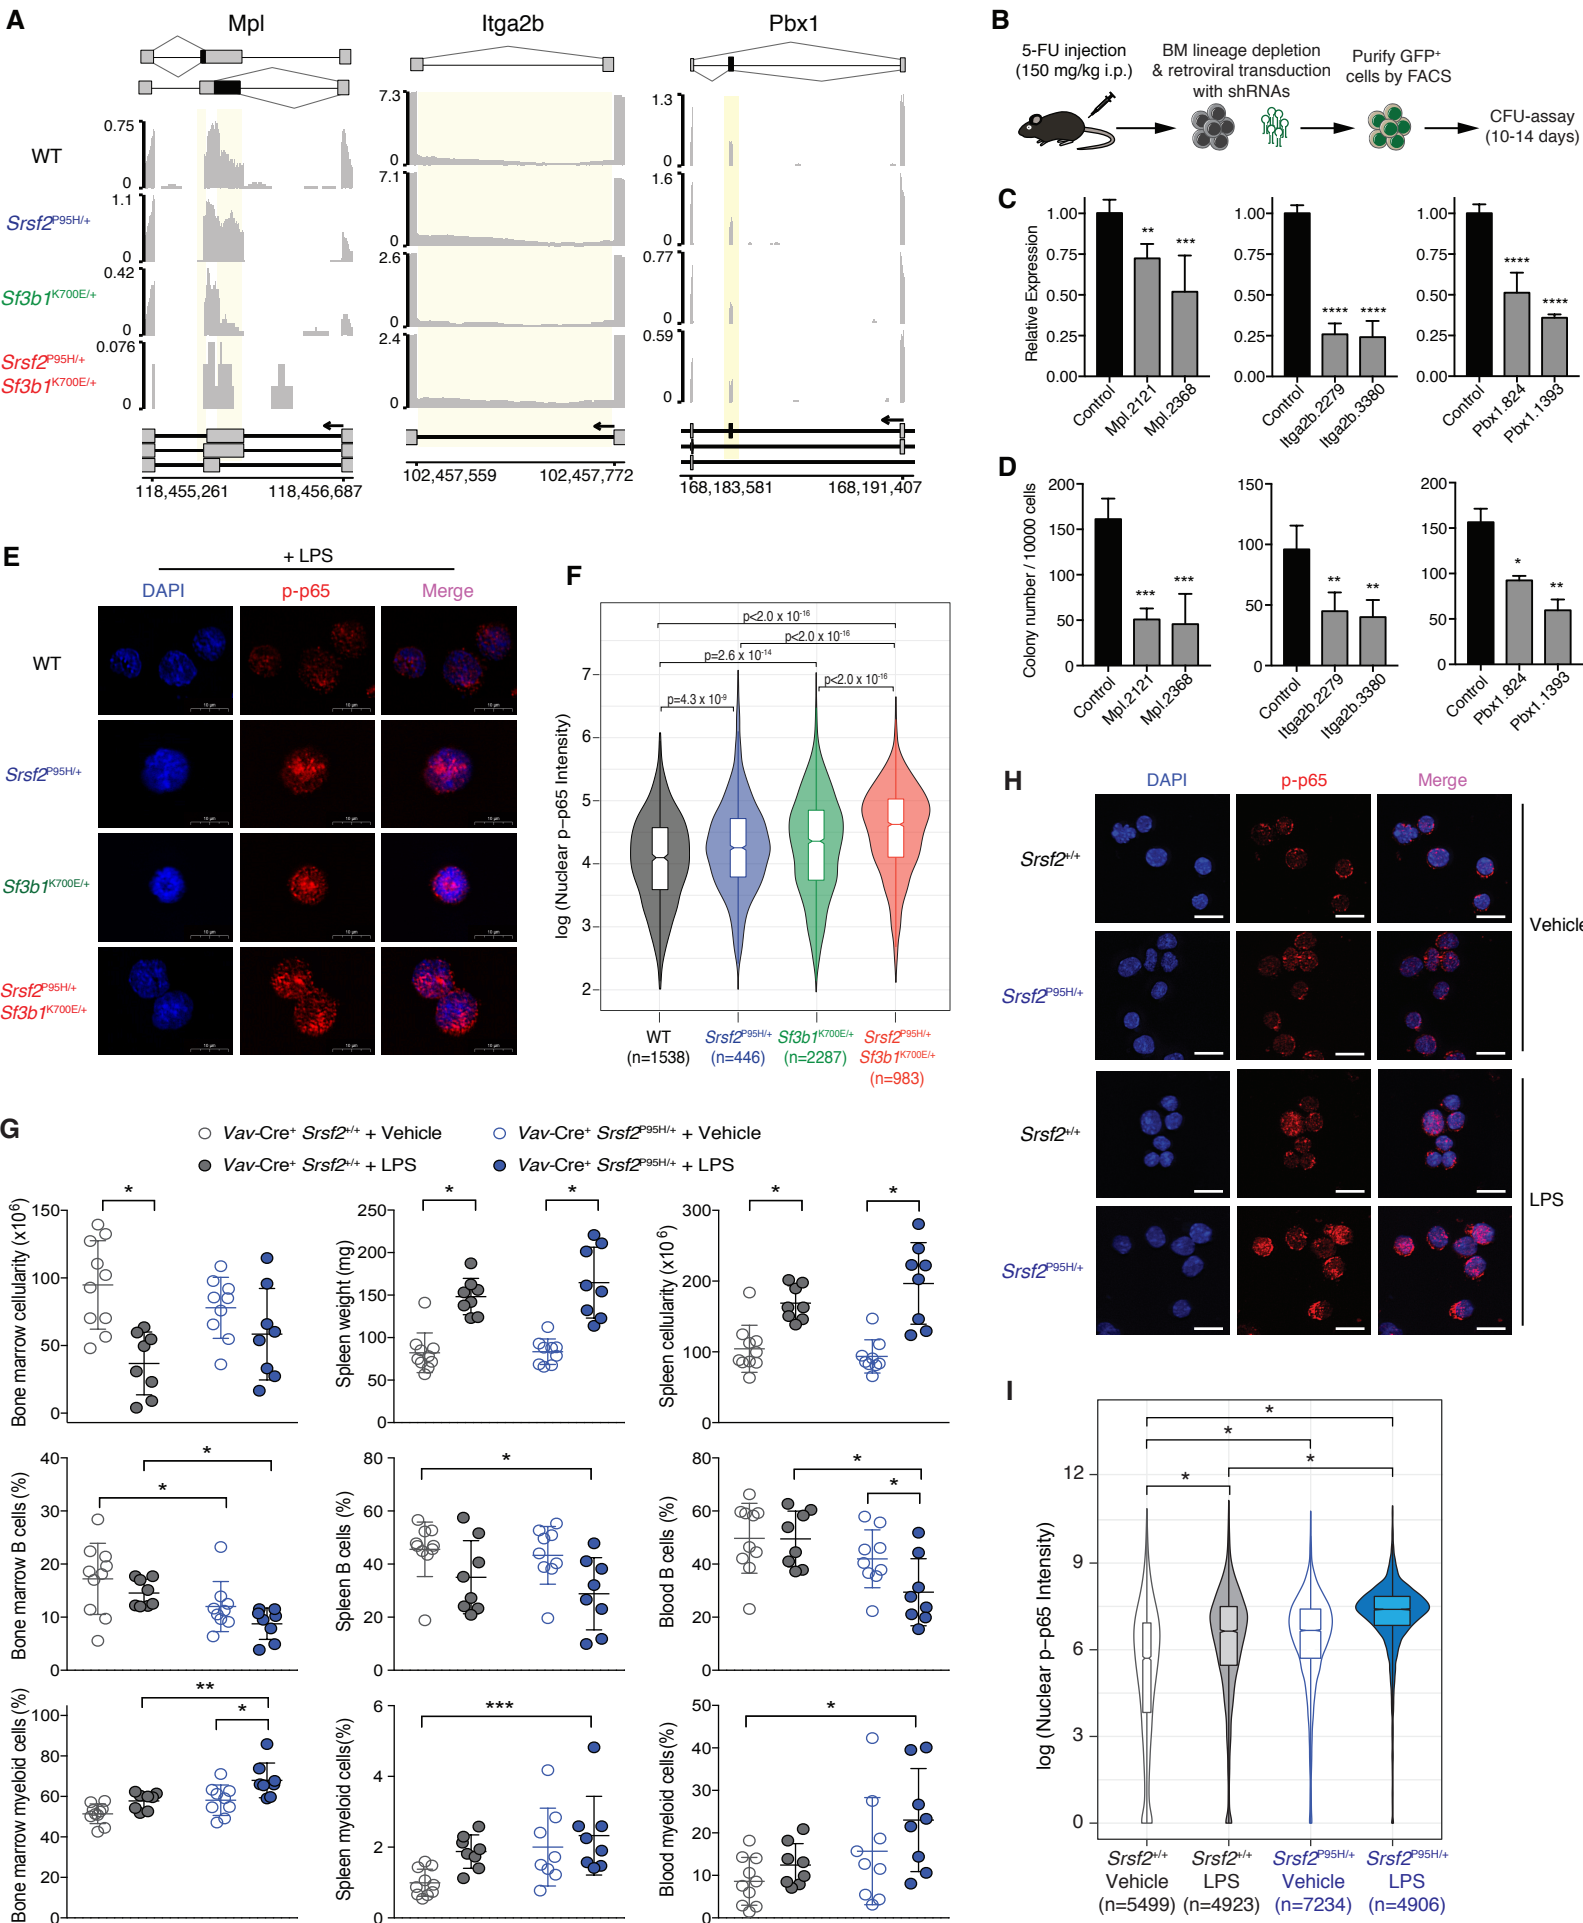

**Figure S5 (Related to Figure 5). Co-expression of *Srsf2* and *Sf3b1* mutations results in aberrant splicing and expression of regulators of hematopoietic stem cell survival and quiescence, as well as increased sensitivity to LPS-induced NF- $\kappa$ B signaling. (A)** RNA-seq read coverage across the genomic loci containing the illustrated differentially spliced events in *Mpl*, *Itga2b* and *Pbx1* for all genotypes. Yellow indicates the differentially spliced sequence for each event. **(B)** Schema of evaluation of the effects of shRNA mediated knockdown of *Mpl*, *Itga2b* and *Pbx1* on 5-fluorouracil-treated, lineage-depleted bone marrow (BM) cells from 8-12 week-old C57BL/6 WT mice. **(C)** Quantitative RT-PCR (qRT-PCR) for *Mpl*, *Itga2b* or *Pbx1* in lineage-negative ( $\text{Lin}^-$ ) bone marrow cells treated with the indicated shRNAs or control shRNA. **(D)** Colony numbers from  $\text{Lin}^-$  HSPCs following shRNA-mediated knockdown of *Mpl*, *Itga2b* and *Pbx1* cells. Error bars represent mean $\pm$ standard deviation. Analysis of variance followed by Tukey's post-hoc test was used to compare differences between groups. \*\* $p < 0.01$  and \*\*\*\* $p < 0.0001$ . **(E)** Immunofluorescence analysis of nuclear phosphorylated-p65 (p-p65) in LK cells from *Vav-Cre*<sup>+</sup> WT, *Vav-Cre*<sup>+</sup> *Srsf2*<sup>P95H/+</sup>, *Vav-Cre*<sup>+</sup> *Sf3b1*<sup>K700E/+</sup>, and *Vav-Cre*<sup>+</sup> *Srsf2*<sup>P95H/+</sup> *Sf3b1*<sup>K700E/+</sup> mice following stimulation with lipopolysaccharide (LPS; 200 ng/mL; 15 min) *ex vivo*. Scale bar: 10  $\mu\text{m}$ . **(F)** Violin plots showing quantitation of nuclear p-p65 intensity of LK cells following LPS stimulation from (E). Analysis of variance using Kruskal-Wallis ranked test was performed. Multiple pair-wise comparisons were adjusted by false-discovery rate (FDR). **(G)** Phenotypic analysis of bone marrow, spleen, and blood from *Vav-Cre*<sup>+</sup> *Srsf2*<sup>+/+</sup> and *Vav-Cre*<sup>+</sup> *Srsf2*<sup>P95H/+</sup> mice following chronic lipopolysaccharide (LPS) or vehicle exposure. Error bars represent mean $\pm$ standard deviation. Analysis of variance followed by Tukey's post-hoc test was used to compare differences between groups, and each p value shown has been adjusted to account for multiple comparisons. \* $p < 0.05$ , \*\* $p < 0.01$ , and \*\*\* $p < 0.001$ . **(H)** Immunofluorescence of phosphorylated p65 (p-p65) intensity from FACS-purified LSK cells following acute exposure to LPS (200 ng/mL; 15 min) *ex vivo*. Scale bar: 10  $\mu\text{m}$ . **(I)** Violin plots showing quantitation of p-p65 intensity in the nucleus of LSK cells following LPS stimulation of the following groups: *Vav-Cre*<sup>+</sup> *Srsf2*<sup>+/+</sup> treated with vehicle (n=5499), *Vav-Cre*<sup>+</sup> *Srsf2*<sup>+/+</sup> treated with LPS (n=4923), *Vav-Cre*<sup>+</sup> *Srsf2*<sup>P95H/+</sup> treated with vehicle (n=7234), and *Vav-Cre*<sup>+</sup> *Srsf2*<sup>P95H/+</sup> treated with LPS (n=4906). Analysis of variance using Kruskal-Wallis ranked test was performed. Multiple pair-wise comparisons were adjusted by false-discovery rate. \* $p < 2.2 \times 10^{-16}$ .

Figure S6

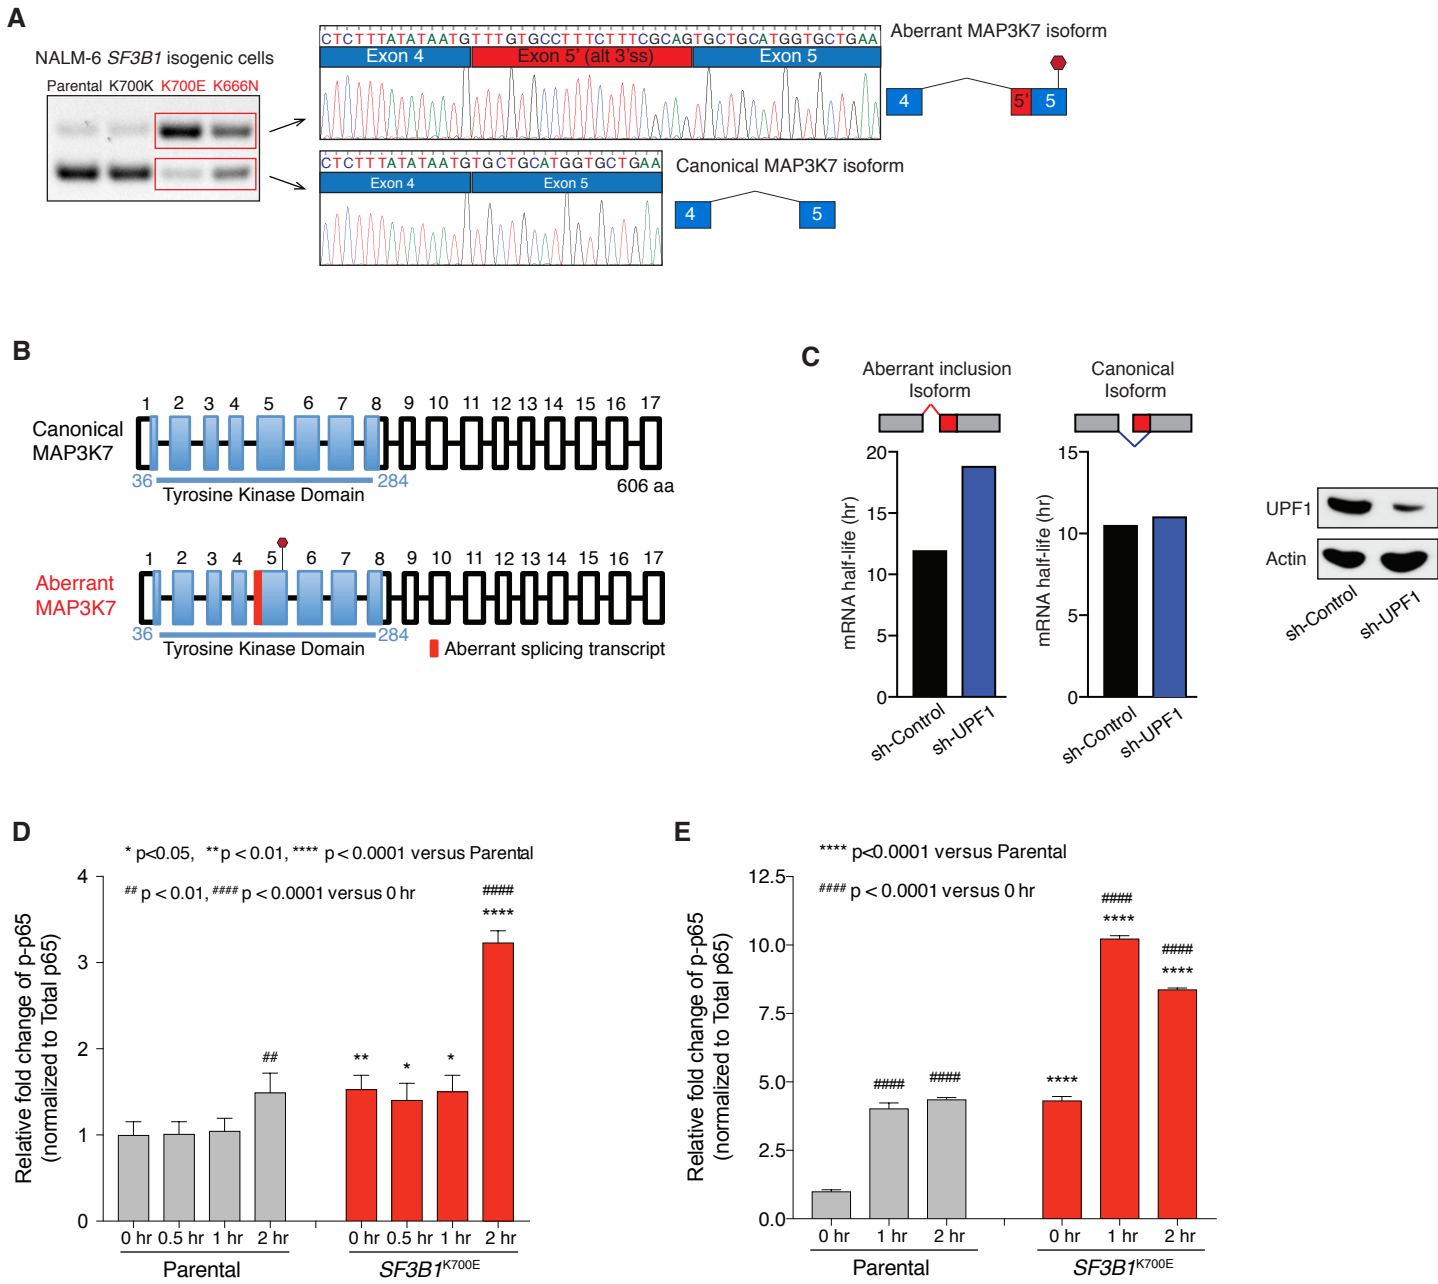

**Figure S6 (Related to Figure 6). *SF3B1* mutations promote mis-splicing of MAP3K7, resulting in hyperactivation of NF- $\kappa$ B signaling. (A)** RT-PCR analysis and Sanger sequencing traces of the normal and aberrantly spliced MAP3K7 isoforms in NALM-6 *SF3B1* isogenic cells. **(B)** Protein diagram of MAP3K7 indicating region of aberrant 3' splice site usage in *SF3B1*-mutant cells. **(C)** mRNA half-life measurements of MAP3K7 3' splice site inclusion (left) and exclusion (right) isoforms in *SF3B1*<sup>K700E</sup> K562 cells. UPF1 knockdown efficiency in these cells is shown by immunoblot. **(D)** Quantitation of immunoblot densitometry of Figure 6E. **(E)** Quantitation of immunoblot densitometry of Figure 6F. Analysis of variance followed by Tukey's post-hoc test was used to compare groups.

Figure S7

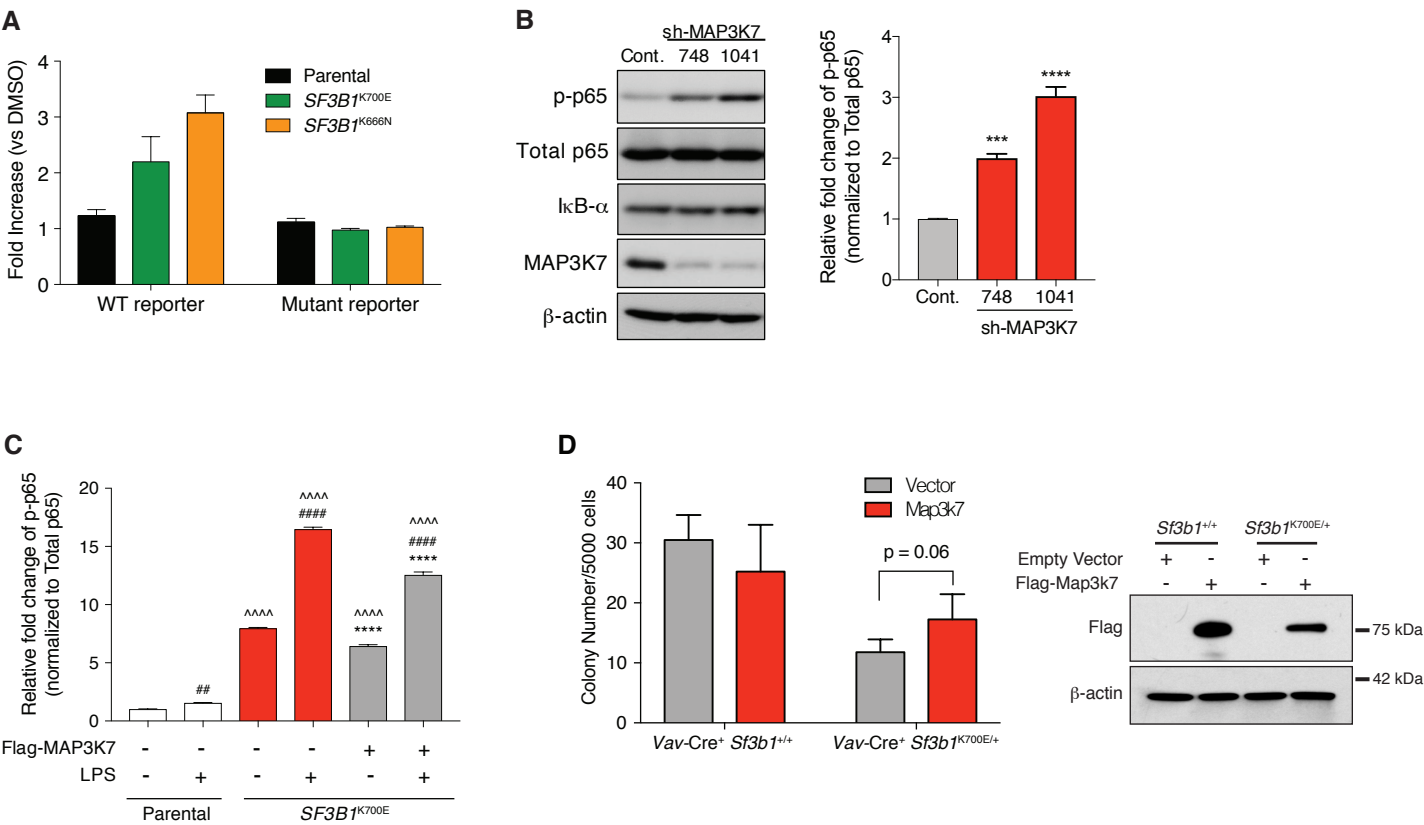

**Figure S7 (Related to Figure 7). MAP3K7 loss results in hyperactive NF- $\kappa$ B signaling in *Sf3b1*-mutant cells. (A)** Fold-change in luciferase activity of NALM-6 isogenic cells transfected with a wildtype NF- $\kappa$ B luciferase reporter or a version of the reporter where all five NF- $\kappa$ B response elements were mutagenized. **(B)** Immunoblot of p-p65, I $\kappa$ B- $\alpha$ , MAP3K7, and loading controls in K562 cells treated with anti-MAP3K7 shRNAs. Quantitation of immunoblot densitometry (left). **(C)** Quantitation of immunoblot densitometry of Figure 7D. Error bars represent mean $\pm$ standard deviation. Analysis of variance followed by Tukey's post-hoc test was used to compare groups. \*\*\*p<0.001 versus sh-Control or parental, \*\*\*\*p<0.0001 versus parental, ## p<0.01 versus unstimulated, ### p<0.001 versus unstimulated, ^^^p<0.0001 parental. **(D)** Numbers of hematopoietic colonies 10-14 days after Map3k7 cDNA expression in lineage-negative (Lin<sup>-</sup>) cells from *Vav-Cre*<sup>+</sup> *Sf3b1*<sup>K700E/+</sup> and *Vav-Cre*<sup>+</sup> WT E14.5 fetal liver cells (Left). Immunoblot analysis of Flag-tagged Map3k7 cDNA from hematopoietic colonies derived from *Vav-Cre*<sup>+</sup> *Sf3b1*<sup>+/+</sup> and *Vav-Cre*<sup>+</sup> *Sf3b1*<sup>K700E/+</sup> cells (Right).

Figure S8

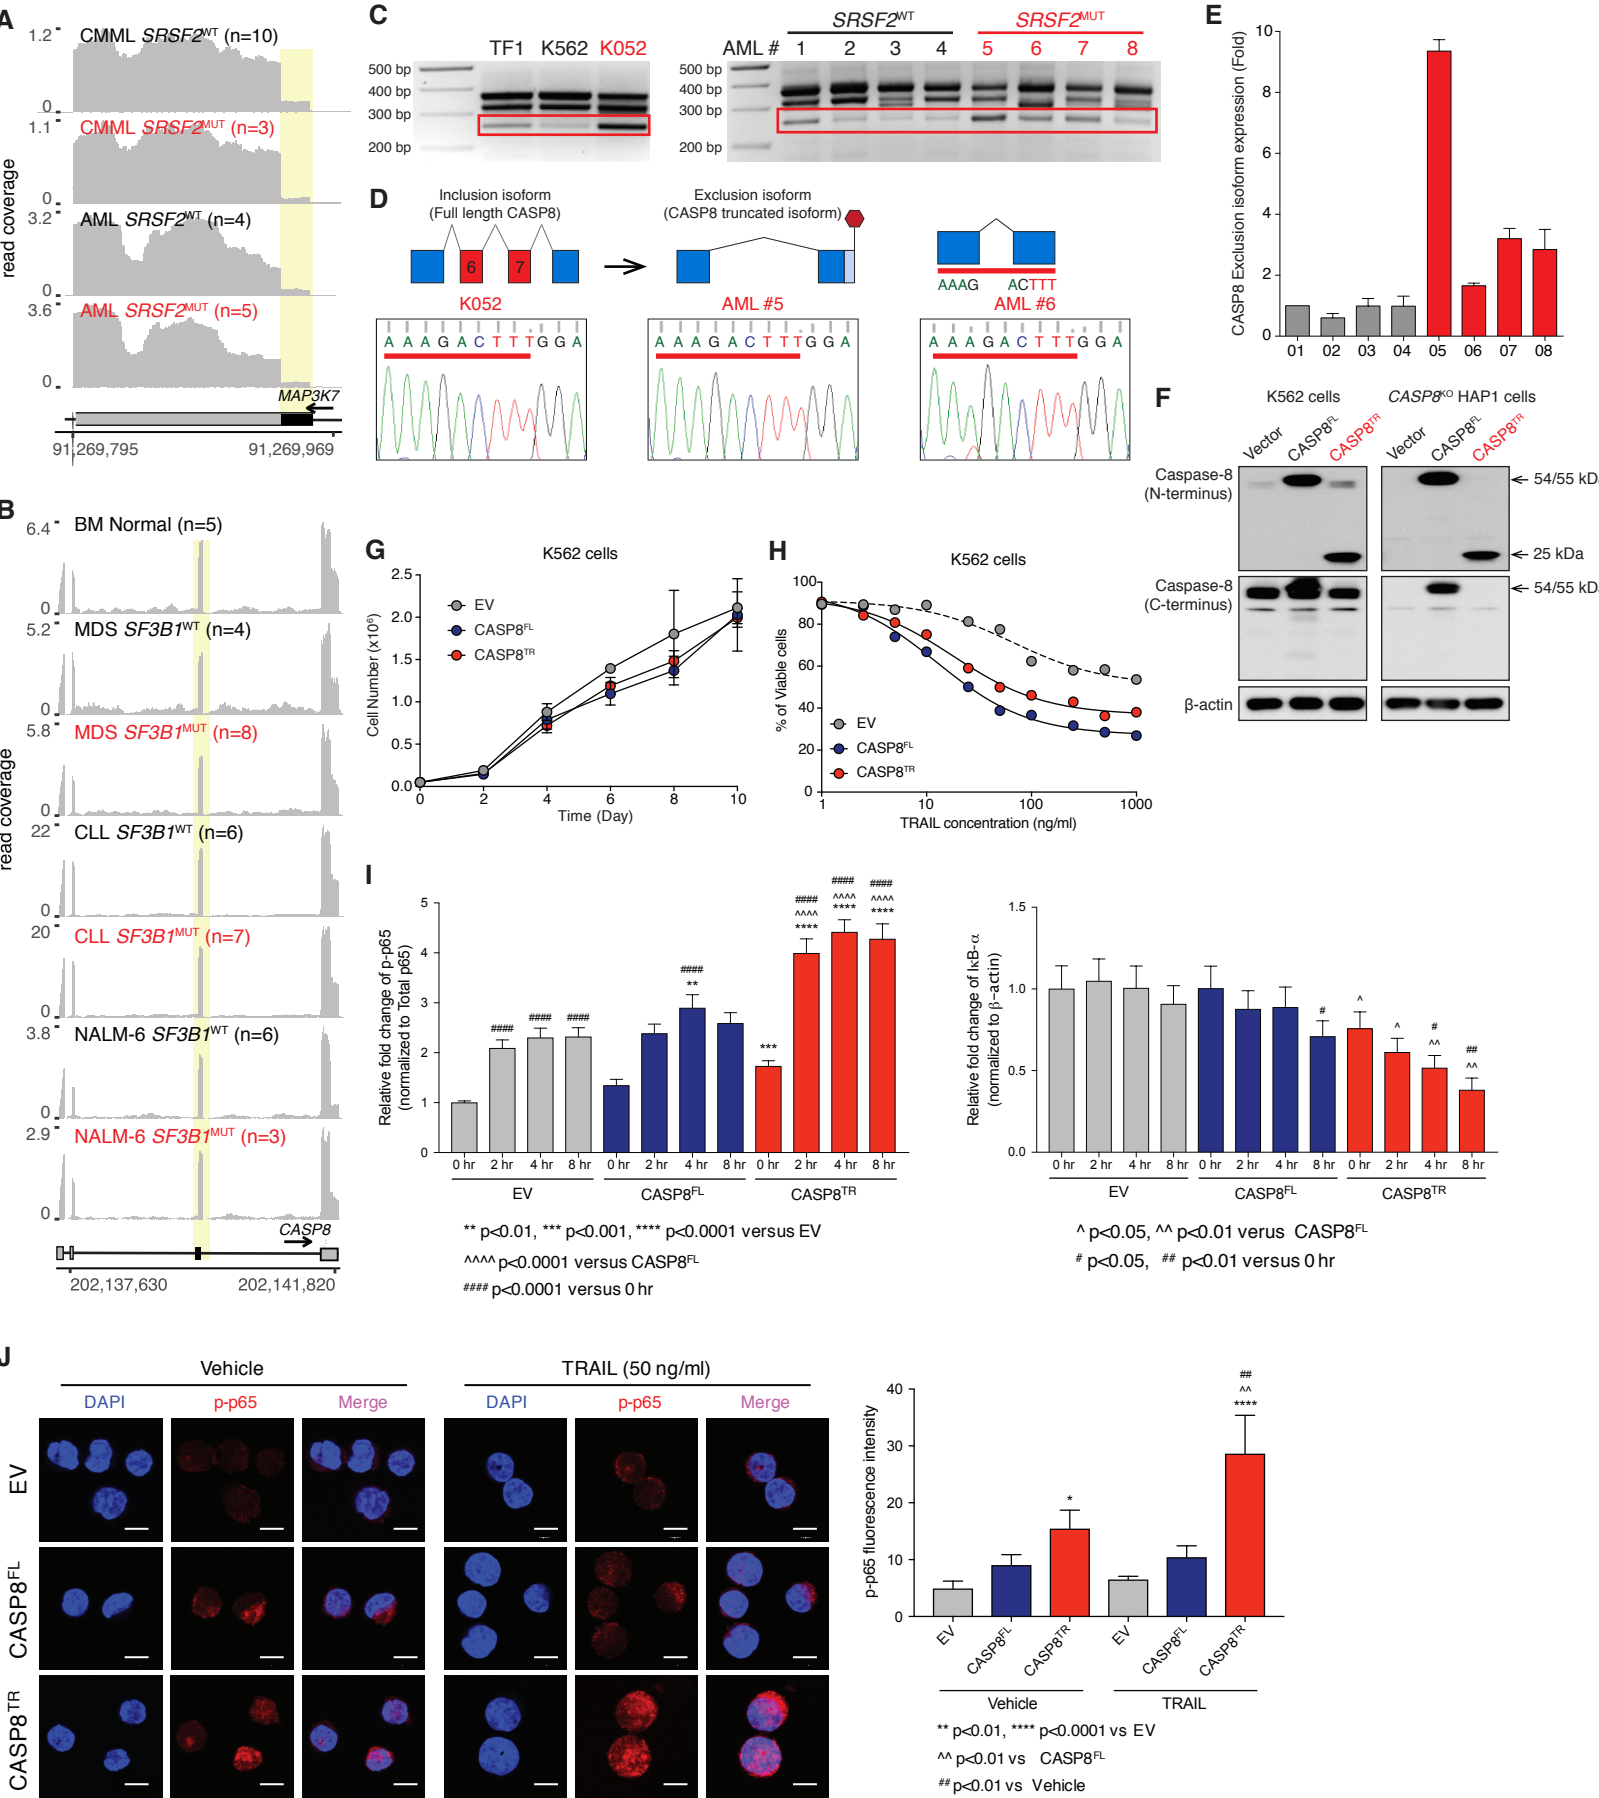

Figure S8

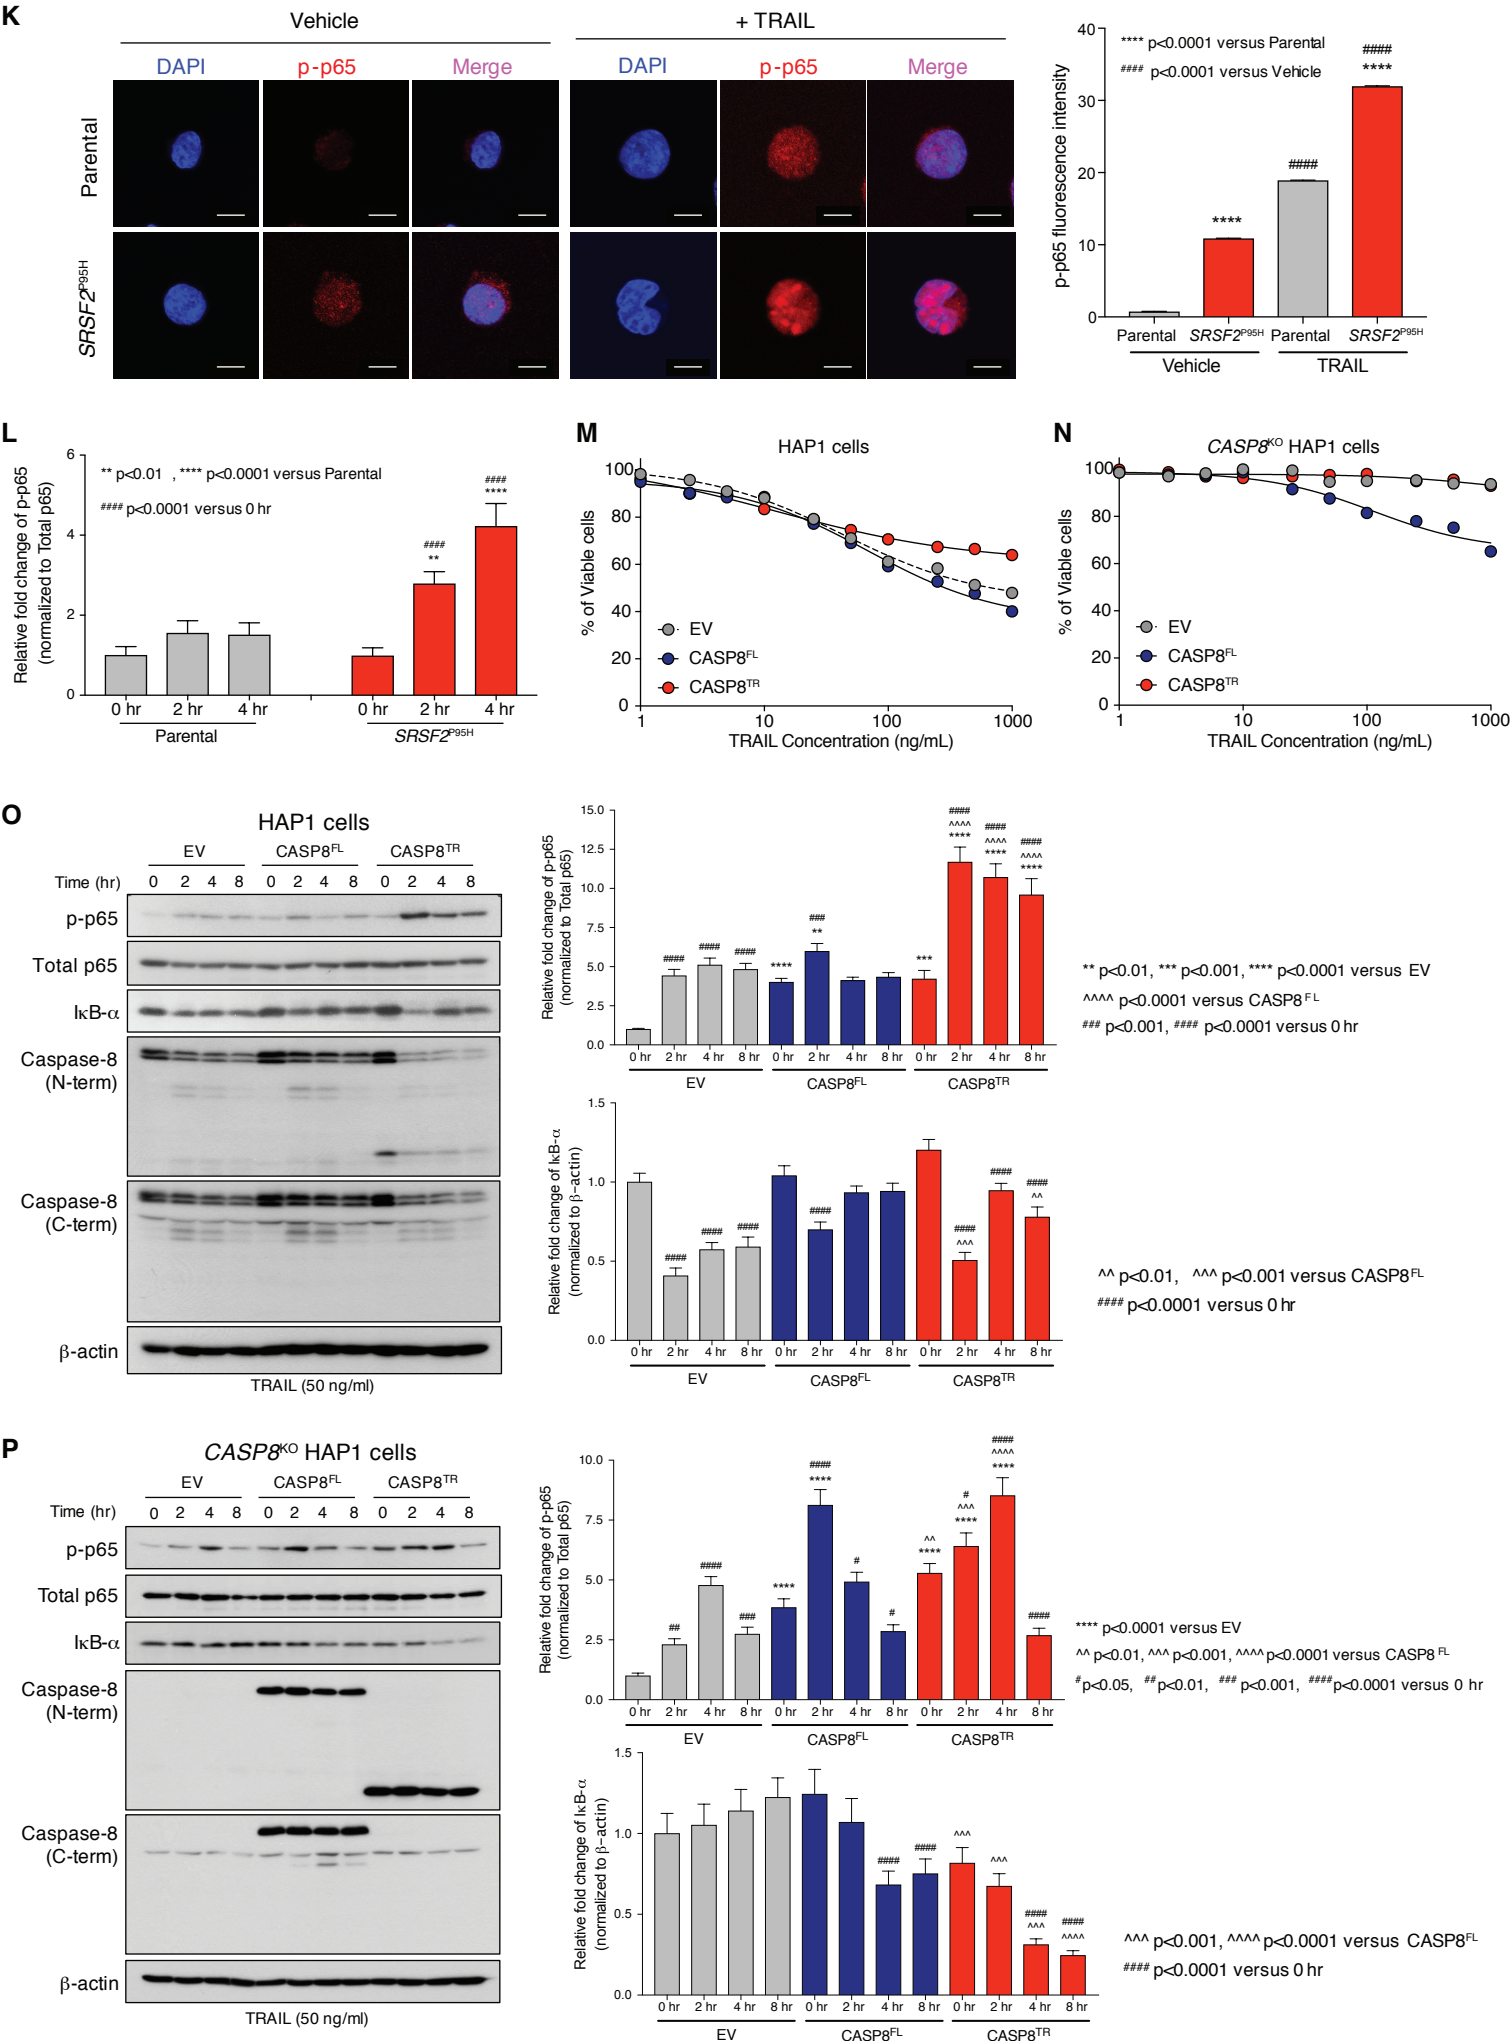

**Figure S8 (Related to Figure 8). *SRSF2* mutations promote aberrant splicing of caspase-8 (CASP8) resulting in expression of a stable truncated protein that hyperactivates NF- $\kappa$ B signaling. (A)** RNA-seq coverage plots of *MAP3K7* in acute myeloid leukemia (AML) and chronic myelomonocytic leukemia (CMML) patient samples wild-type (WT) or mutant (MUT) for *SRSF2*. **(B)** RNA-seq coverage plots of *CASP8* in normal human bone marrow (BM) cells as well as the NALM-6 cell line and cells from myelodysplastic syndrome (MDS) and chronic lymphocytic leukemia (CLL) patients wild-type (WT) or mutant (MUT) for *SF3B1*. **(C)** RT-PCR of the *CASP8* splicing event in human leukemia cell lines and primary human AML patient samples WT or mutant for *SRSF2* with diagram of predicted effects of *CASP8* mRNA. The red box highlights the *CASP8* isoform promoted by mutant *SRSF2*. **(D)** Sanger sequencing traces of the aberrant *CASP8* isoform (*CASP8*<sup>TR</sup>) in *SRSF2*-mutant leukemia cell line (K052) and *SRSF2*-mutant primary AML patient samples. **(E)** Quantitative RT-PCR (qRT-PCR) analysis of the aberrant *CASP8* isoform expression in AML patient samples WT or mutant for *SRSF2*. **(F)** Immunoblot analysis of caspase-8 in K562 cells (left panel) and *CASP8*<sup>KO</sup> HAP1 cells (right panel) expressing cDNA constructs encoding empty vector (EV), full-length *CASP8* (*CASP8*<sup>FL</sup>), or the aberrantly spliced caspase-8 truncated isoform (*CASP8*<sup>TR</sup>). **(G)** Growth assay of K562 cells overexpressing empty vector control (EV), full-length caspase-8 (*CASP8*<sup>FL</sup>) and the aberrant caspase-8 truncated isoform (*CASP8*<sup>TR</sup>). **(H)** Cell viability assay using CellTiter-Glo in K562 cells expressing empty vector control (EV), *CASP8*<sup>FL</sup>, and *CASP8*<sup>TR</sup> isoforms 48 hr post-TRAIL stimulation. **(I)** Quantitation of immunoblot densitometry of Figure 8E. **(J)** Immunofluorescence analysis of phosphorylated p65 (p-p65) in K562 cells from Figure 8E with quantitation of results shown on right. Scale bar: 10  $\mu$ m. **(K)** Immunofluorescence analysis of phosphorylated p65 (p-p65) in isogenic genetically modified K562 cells with or without *SRSF2*<sup>P95H</sup> mutation expressed from the endogenous *SRSF2* locus with and without TRAIL stimulation (50 ng/mL). Scale bar: 10  $\mu$ m. **(L)** Quantitation of immunoblot densitometry of Figure 8G. Cell viability assay using CellTiter-Glo in **(M)** HAP1 and **(N)** *CASP8*<sup>KO</sup> HAP1 cells expressing EV control, *CASP8*<sup>FL</sup>, and *CASP8*<sup>TR</sup> isoforms 48 hr post TRAIL stimulation. Analysis of NF- $\kappa$ B signaling following TRAIL stimulation (50 ng/mL) in **(O)** HAP1 and **(P)** *CASP8*<sup>KO</sup> HAP1 cells expressing EV, *CASP8*<sup>FL</sup>, and *CASP8*<sup>TR</sup> isoforms. Quantification of immunoblot signals using densitometry is shown on right. Analysis of variance followed by Tukey's post-hoc test was used to compare groups.
